# Supplementary material for: HBO1-MLL interaction promotes AF4/ENL/P-TEFb-mediated leukemogenesis
Source: PubMed Central journal article supplement (PMC8387021; doi:10.7554/elife.65872), 2021-08-25

Figure 2

B

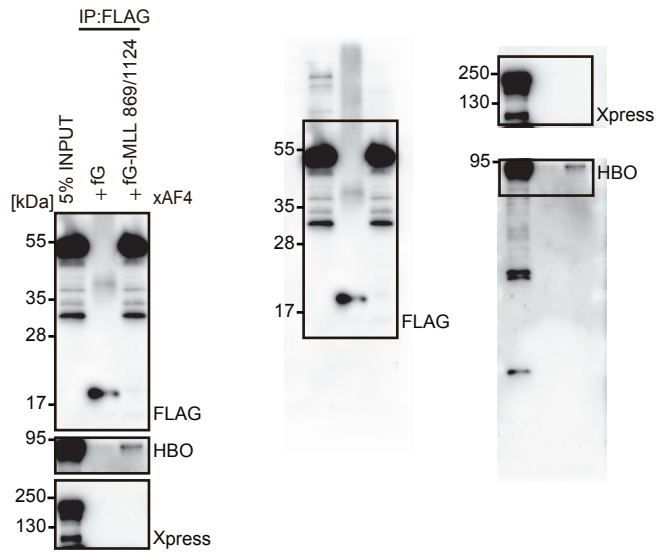

C

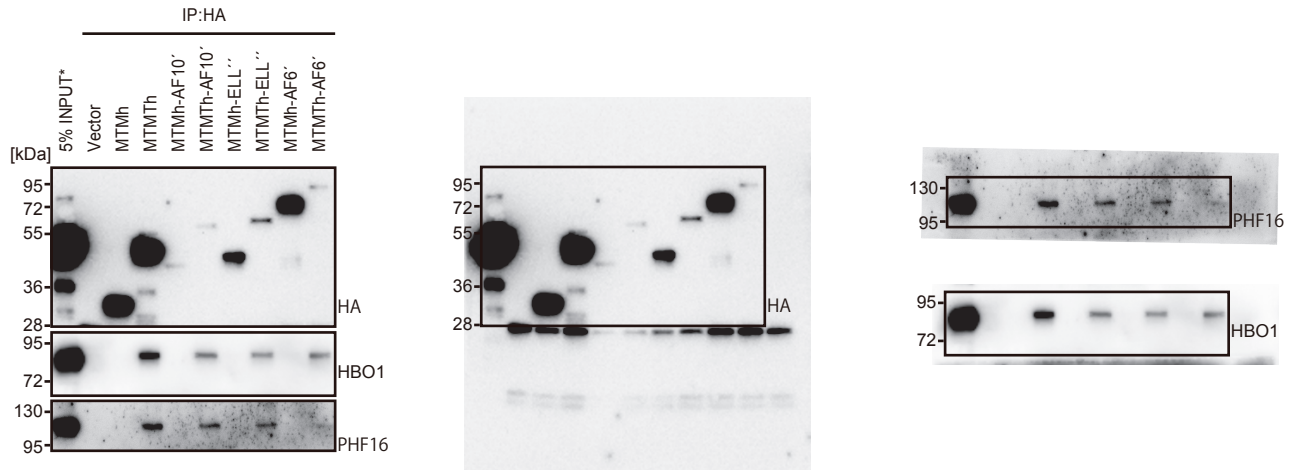

Figure 3

D

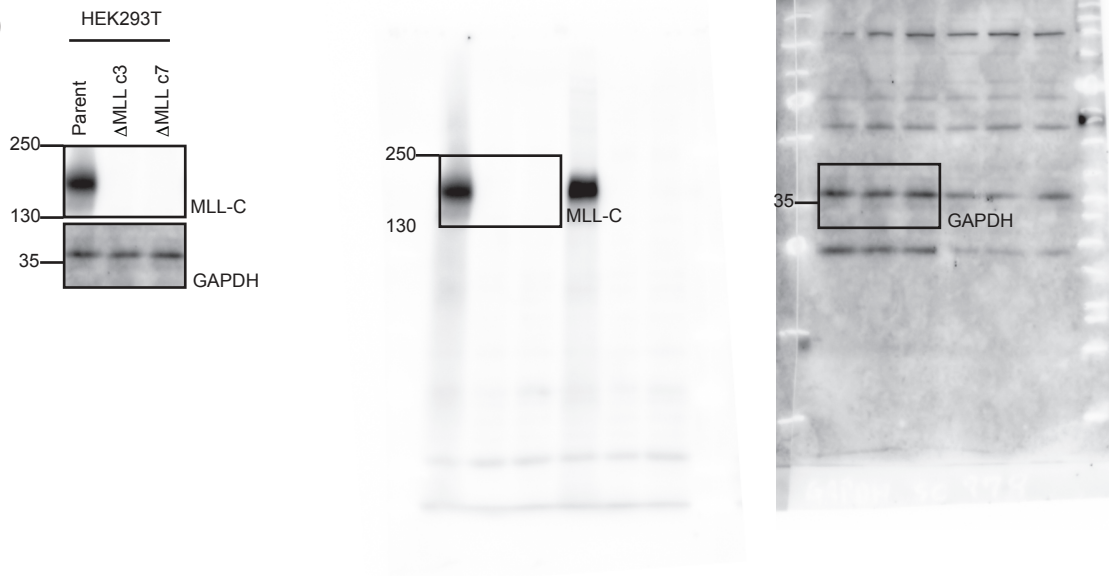

Figure 4

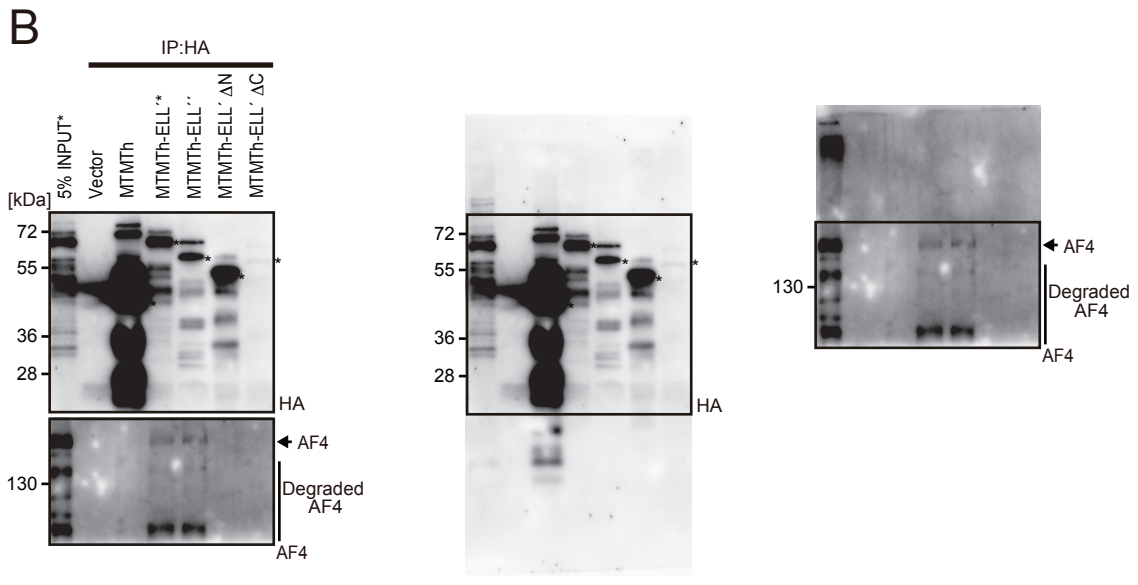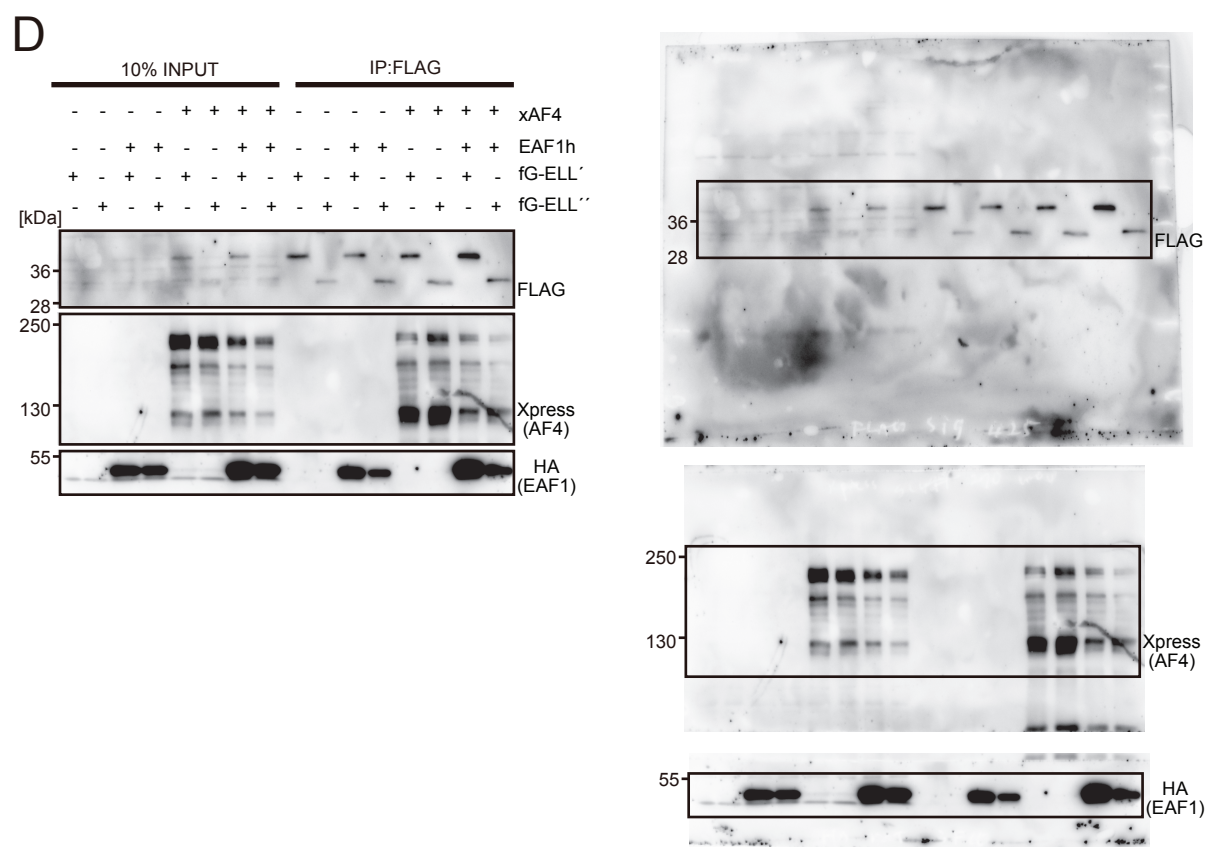



Figure 5

C

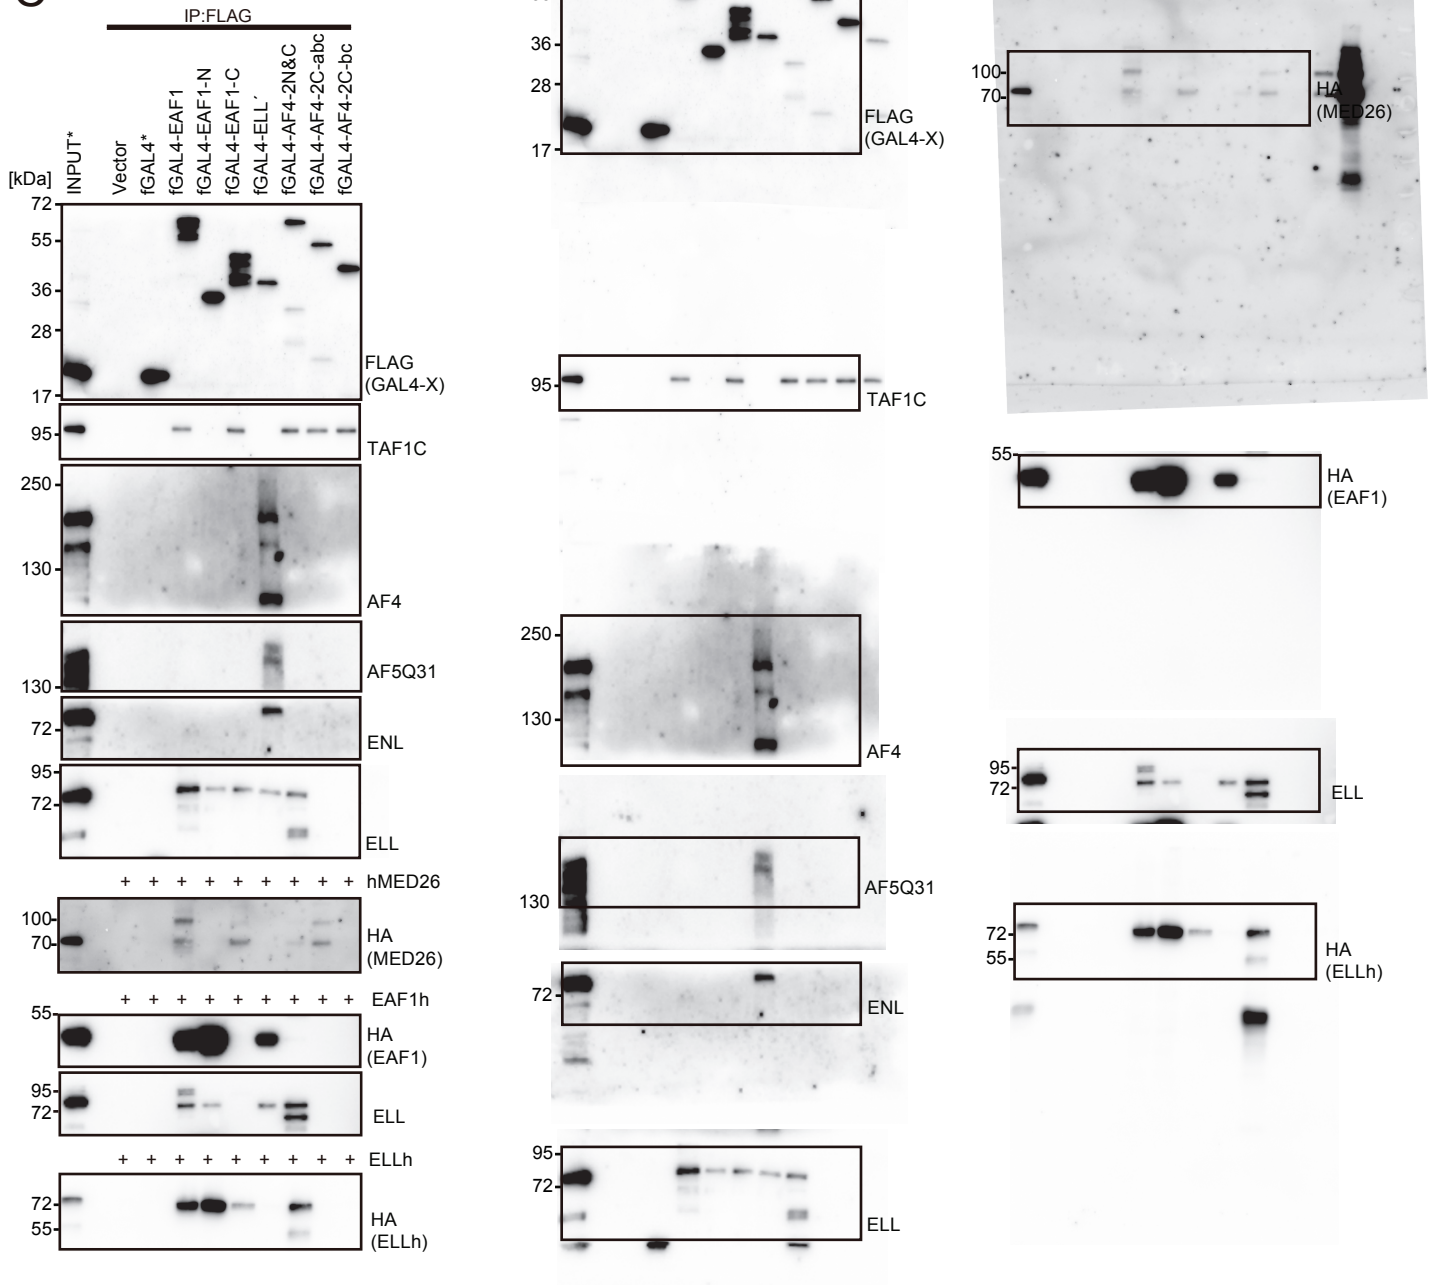

Figure 6

A

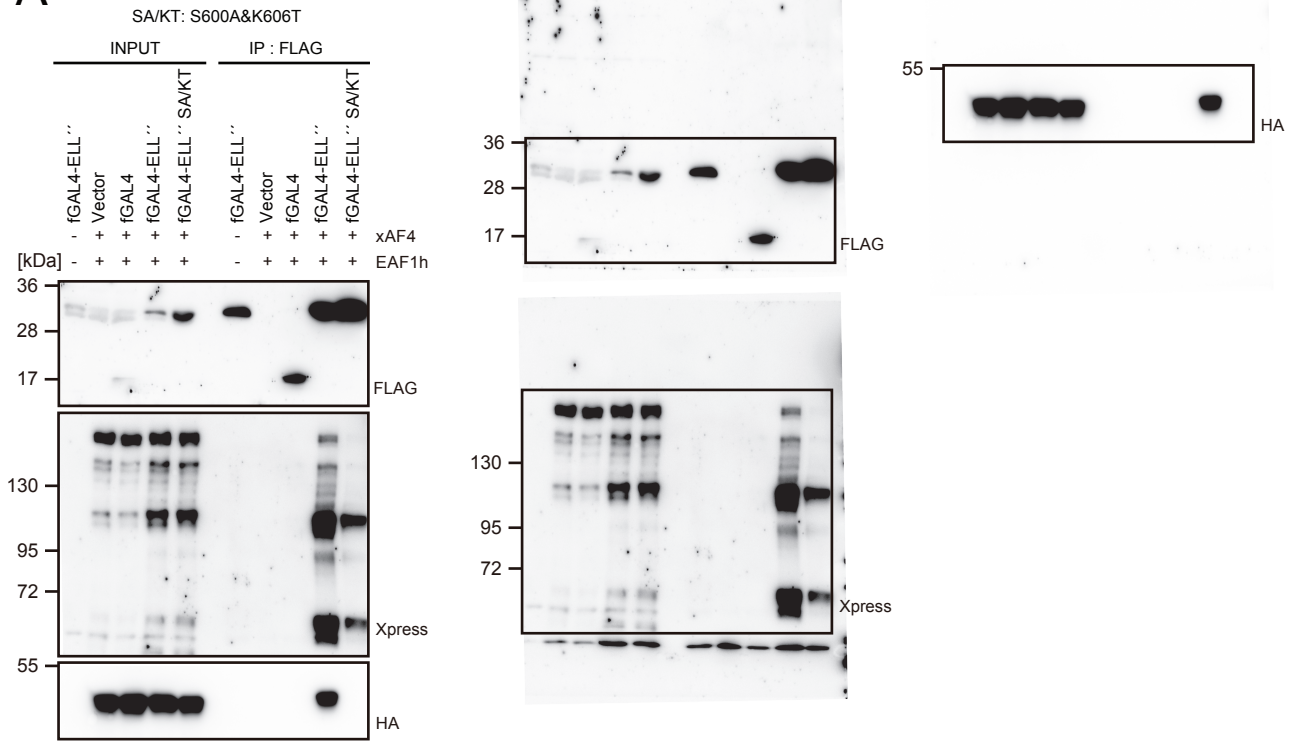

E

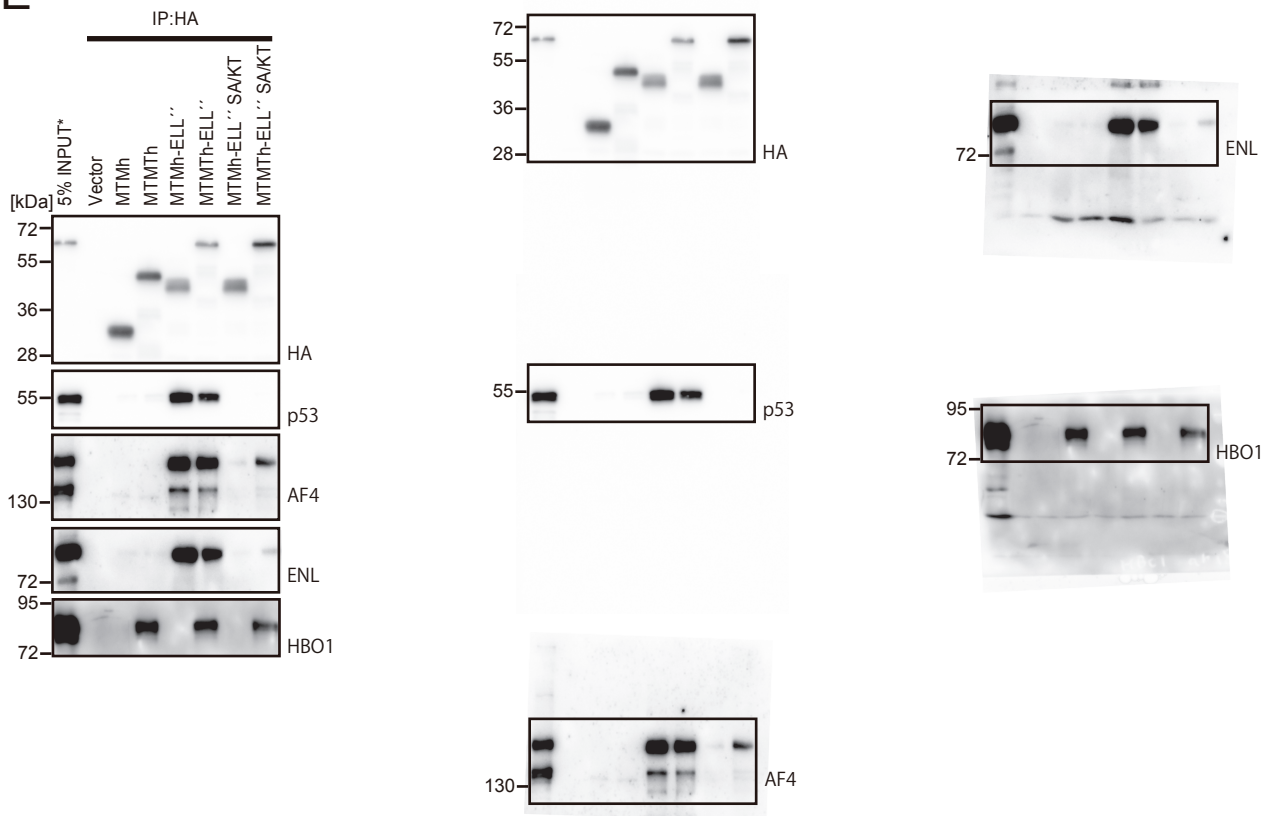

Figure 7

B

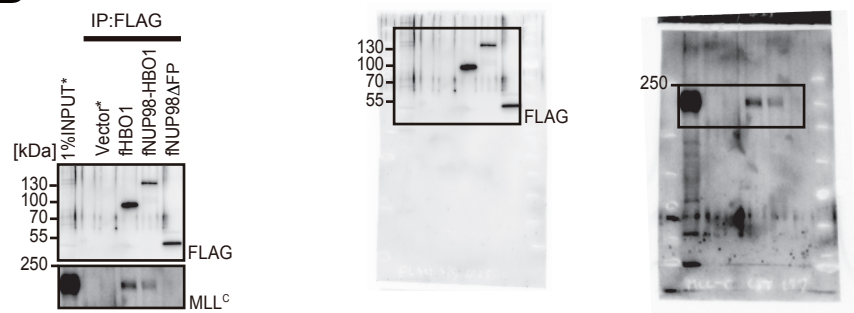

D

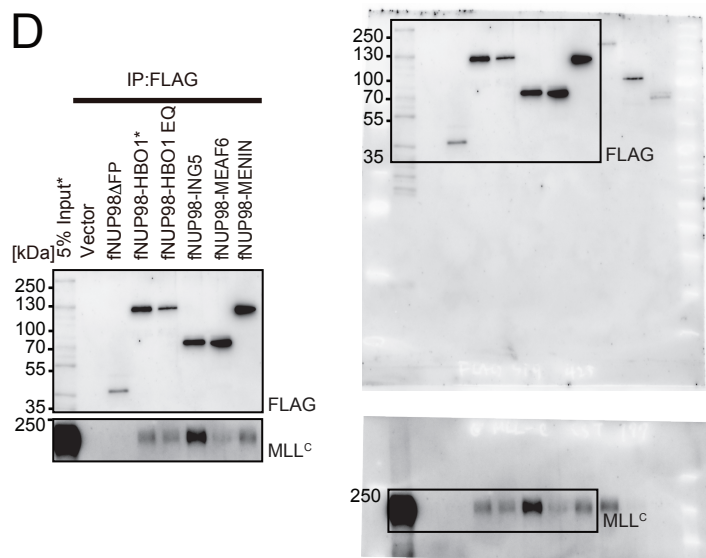

Figure 8

A

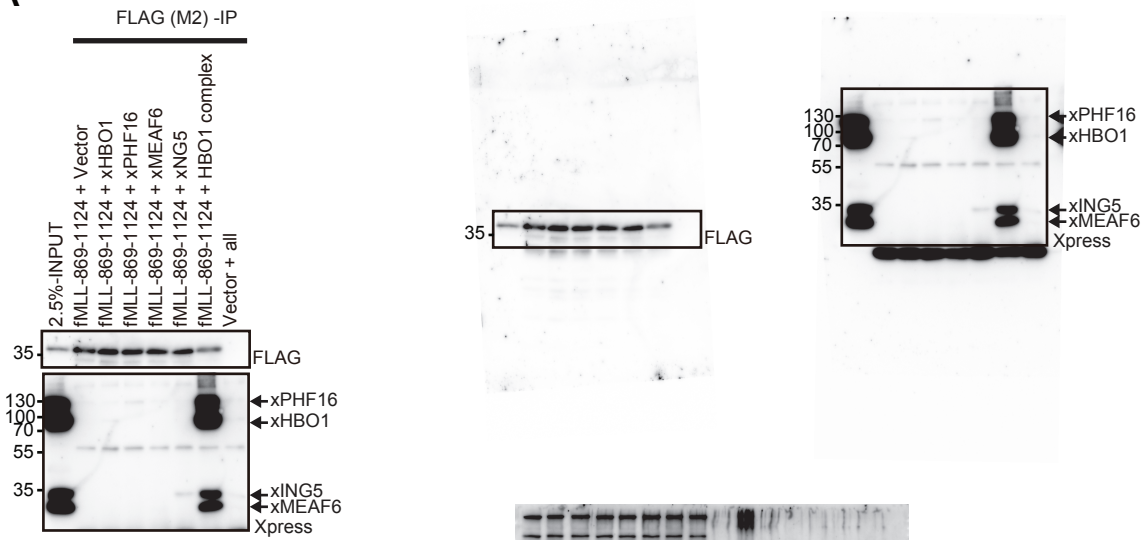

B

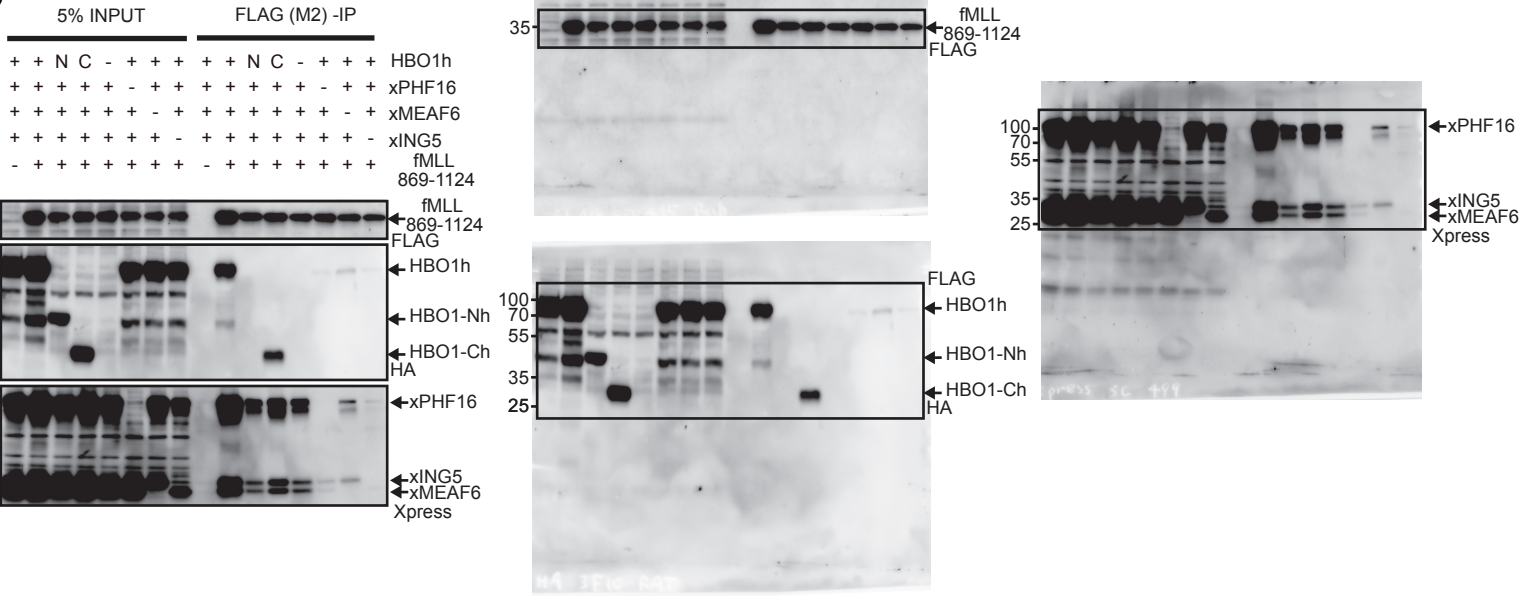

C

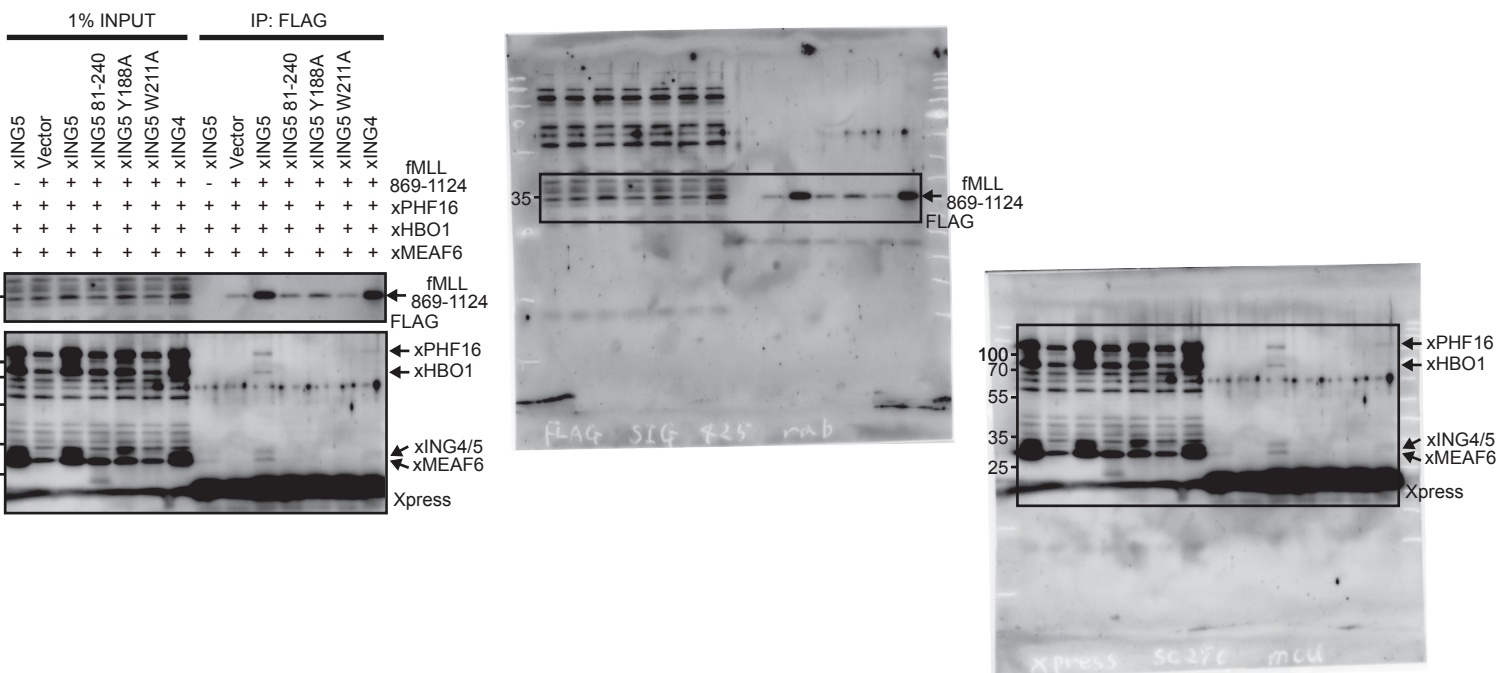

Figure 1-figure supplement 1

A

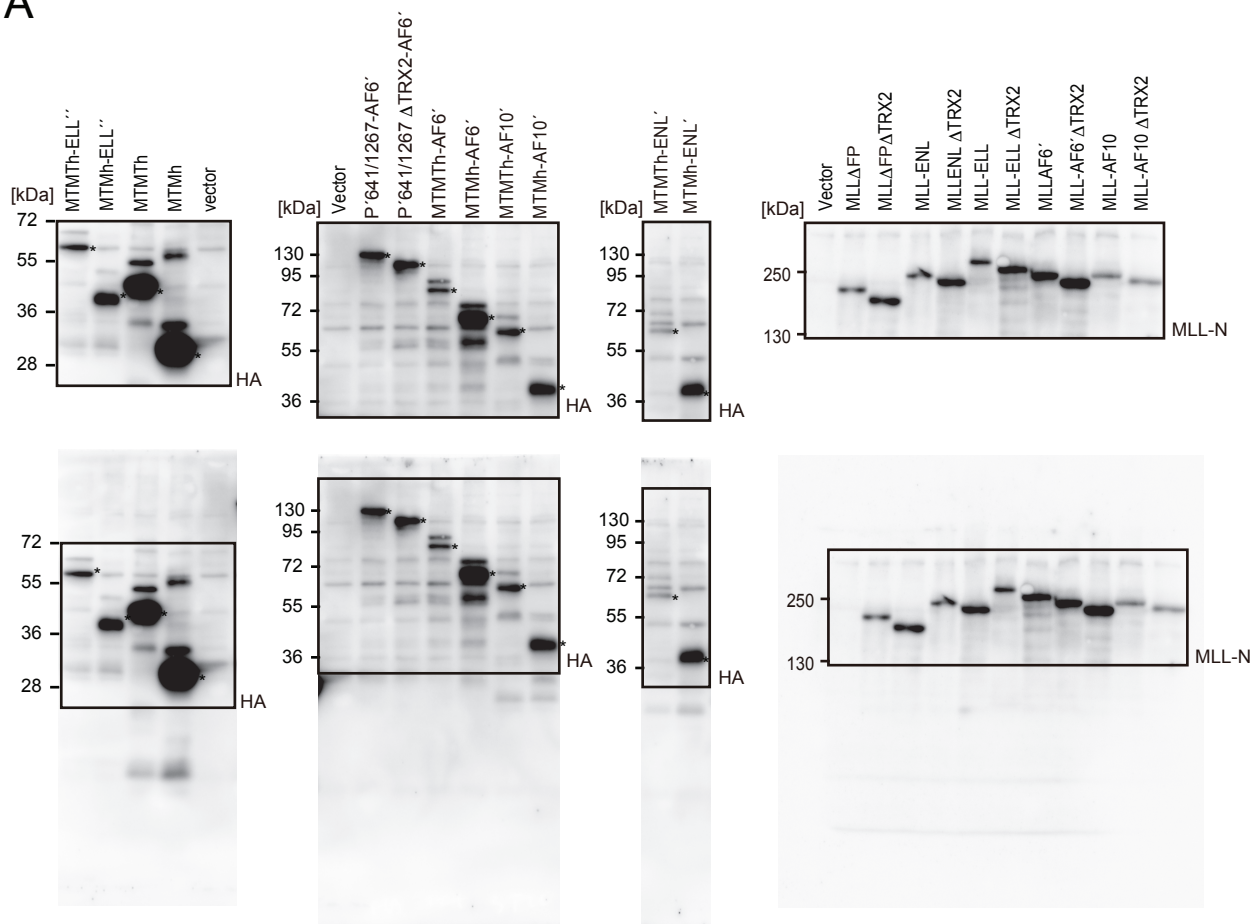



Figure 2-figure supplement 1

A

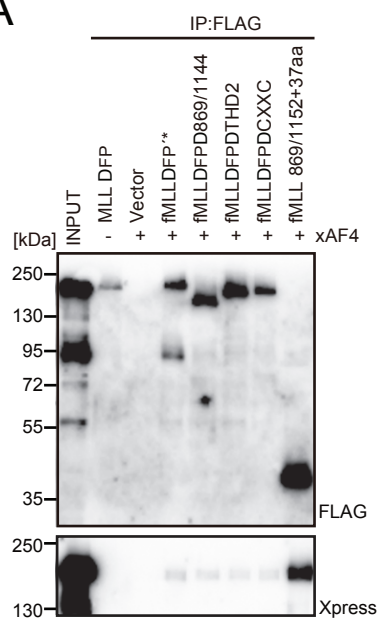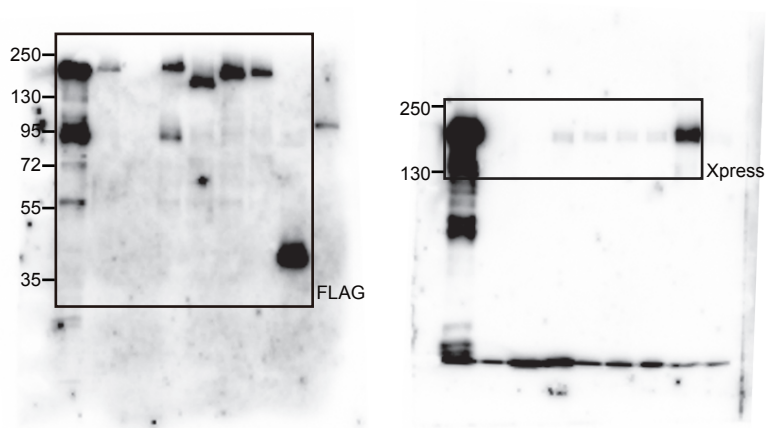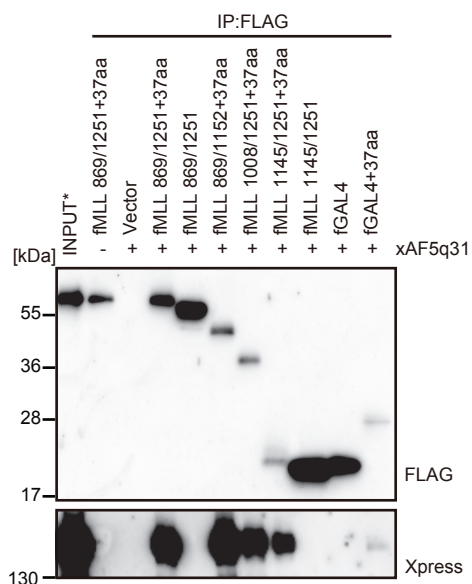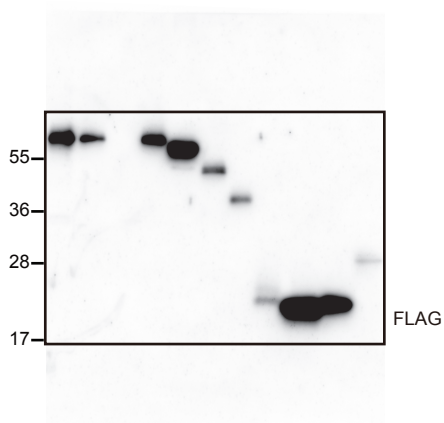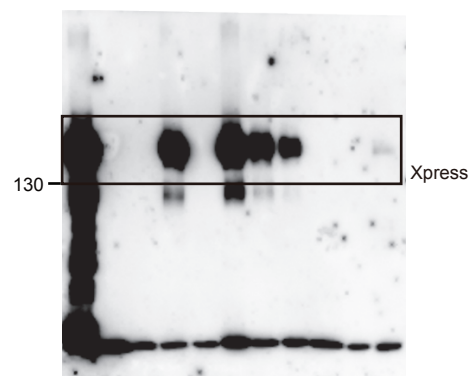

Figure 2-figure supplement 2

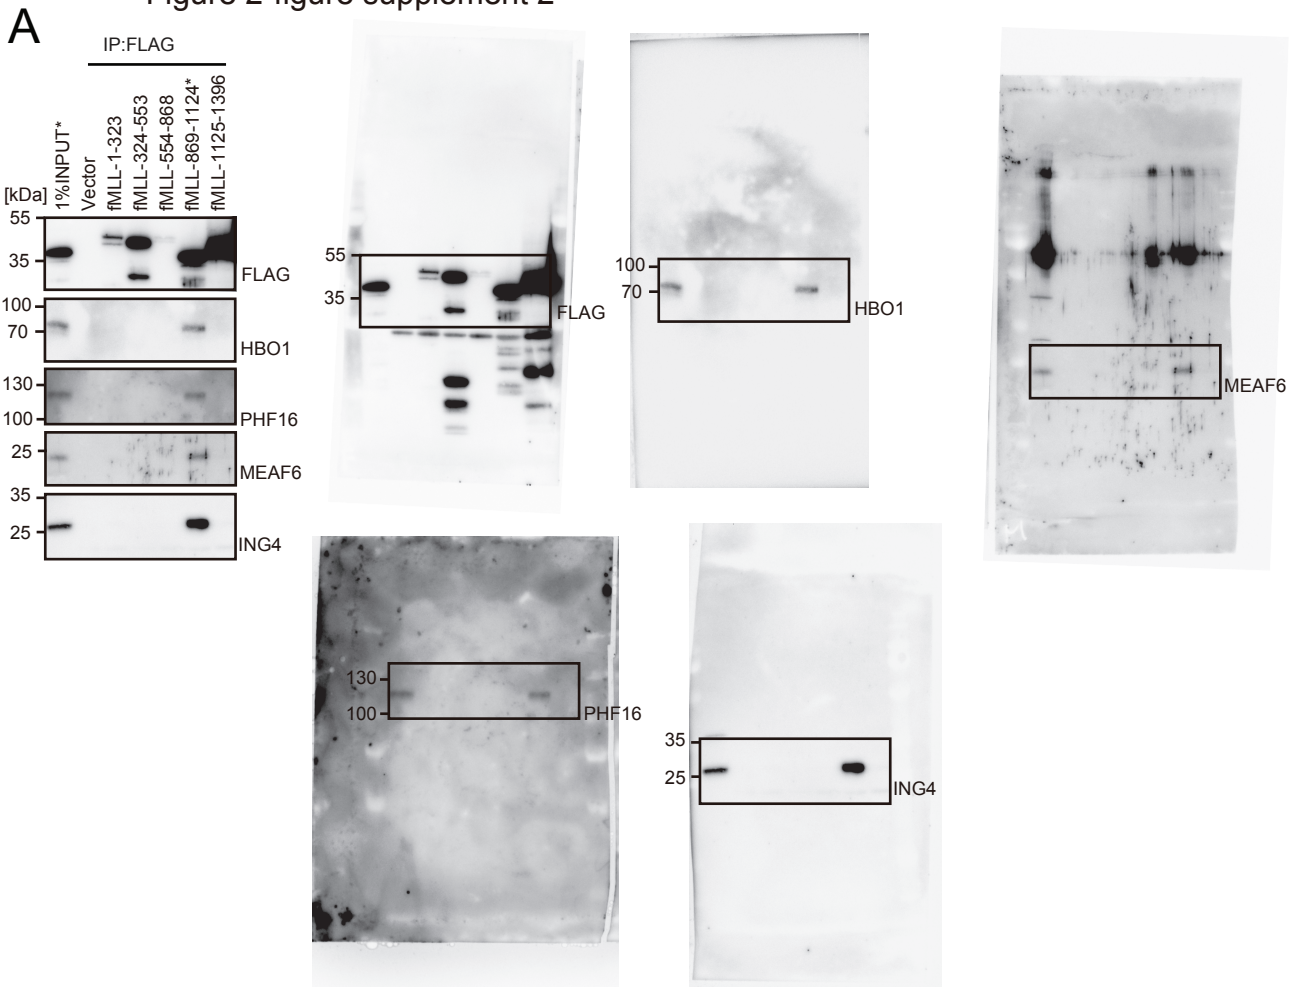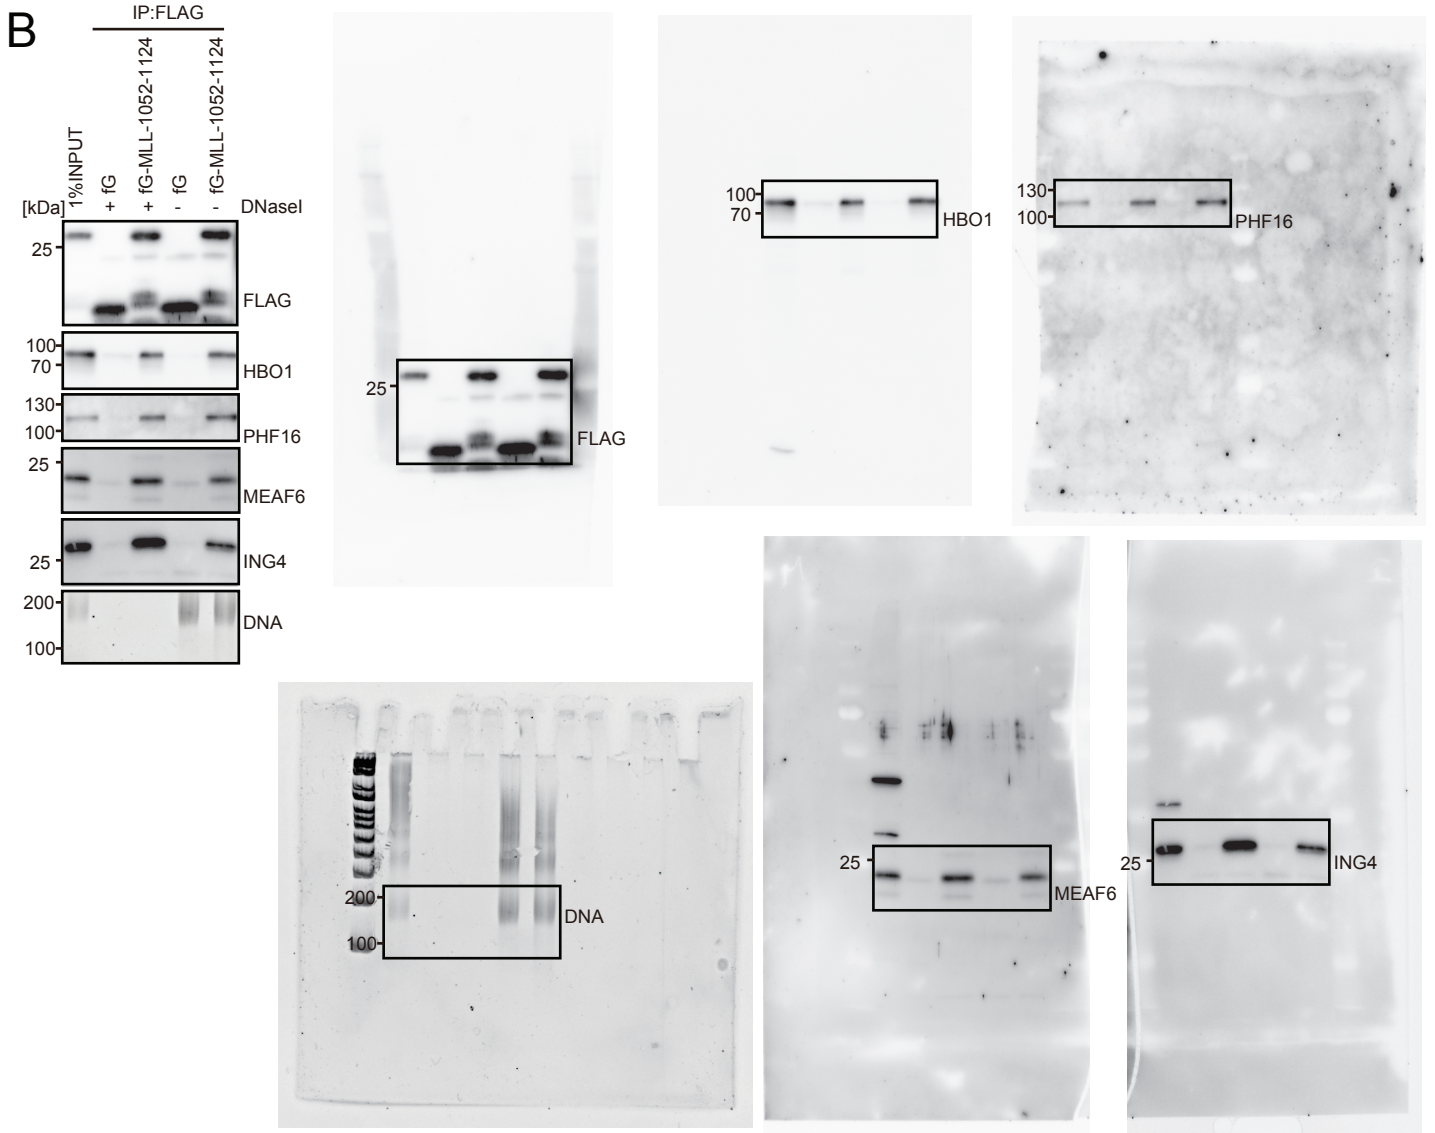

**C**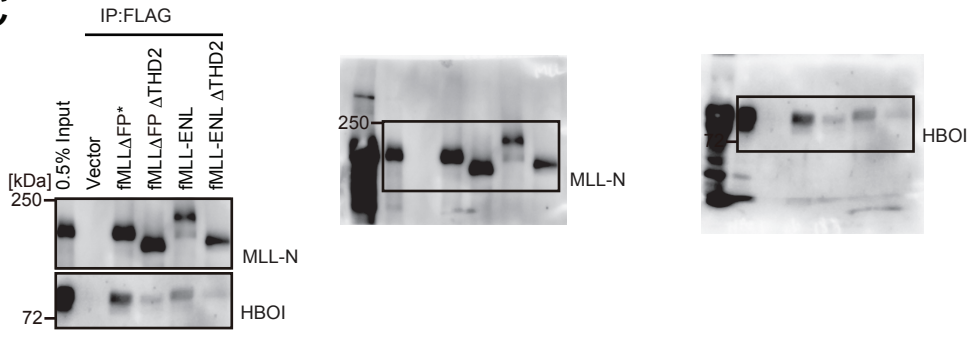**D**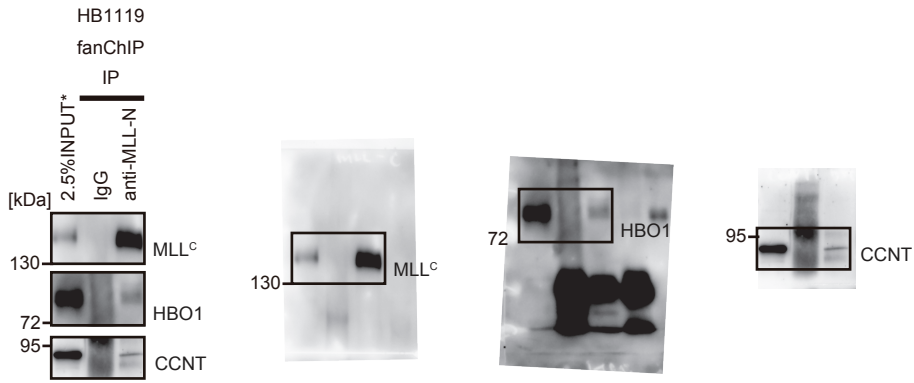**E**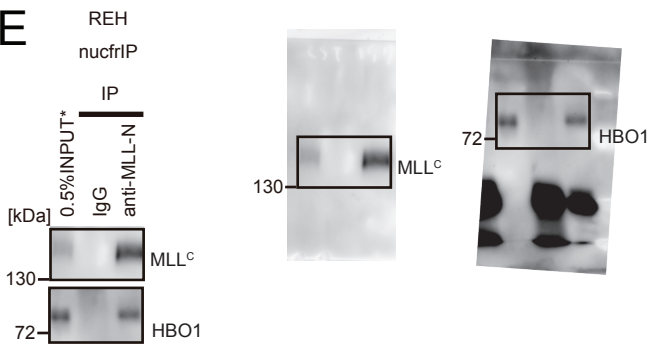

Figure 4-figure supplement 1

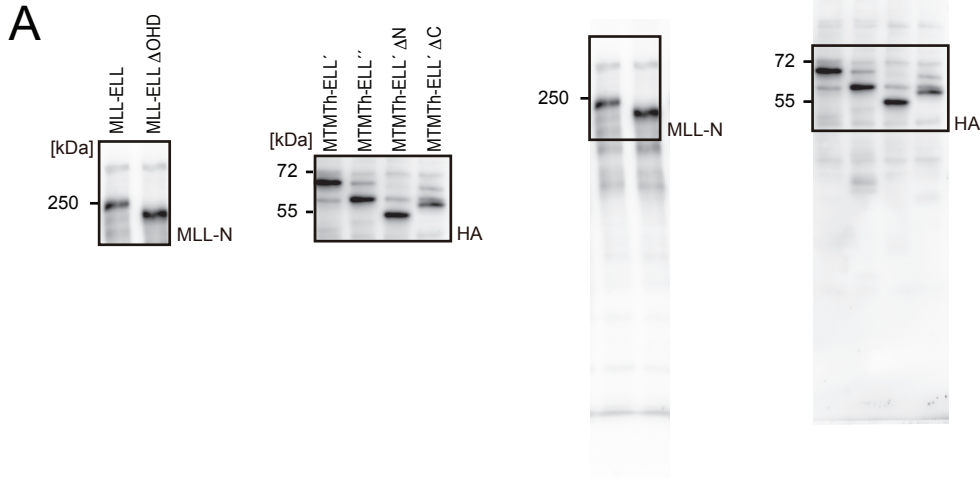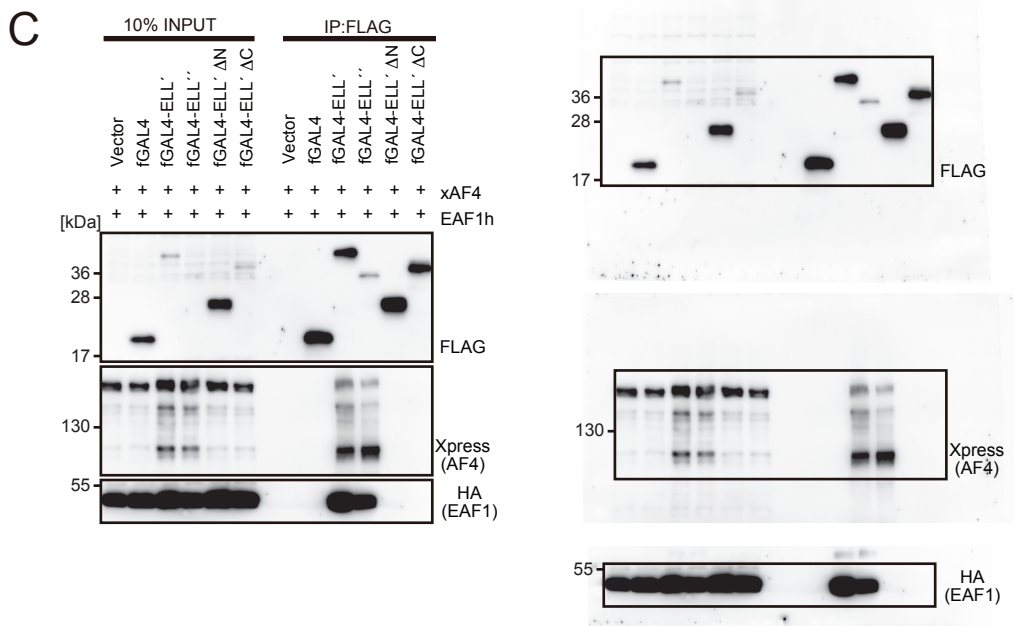

Figure 5-figure supplement 1

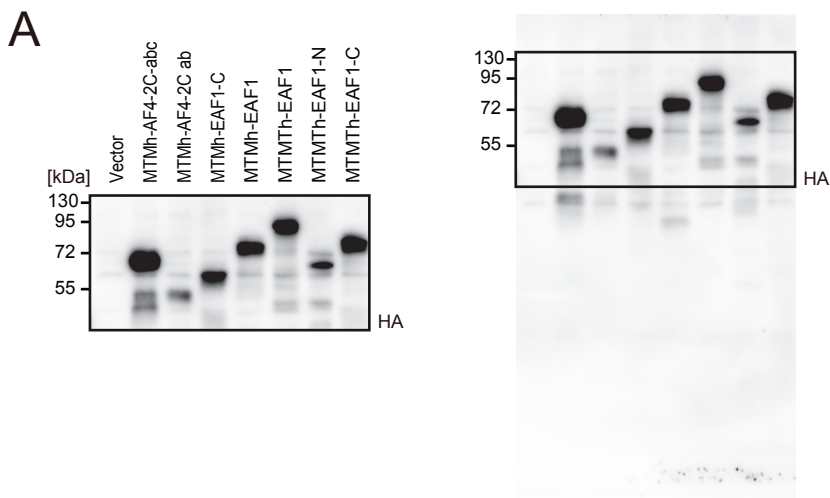

Figure 6-figure supplement 1

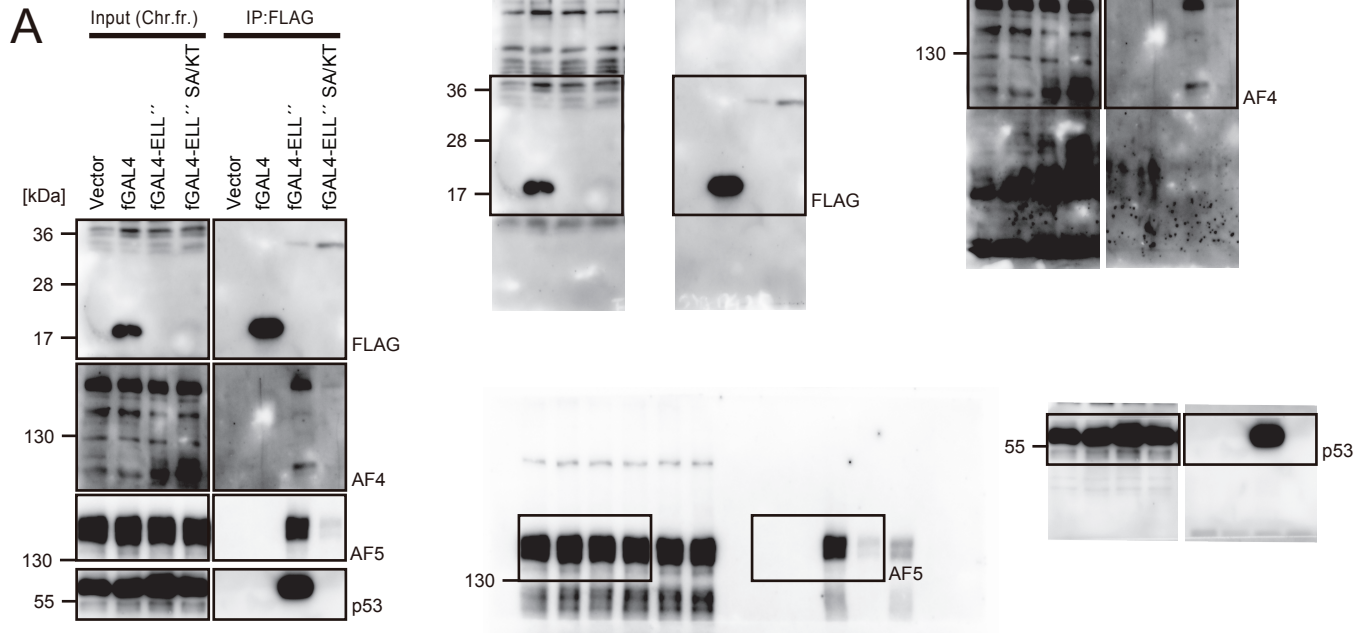

**C**

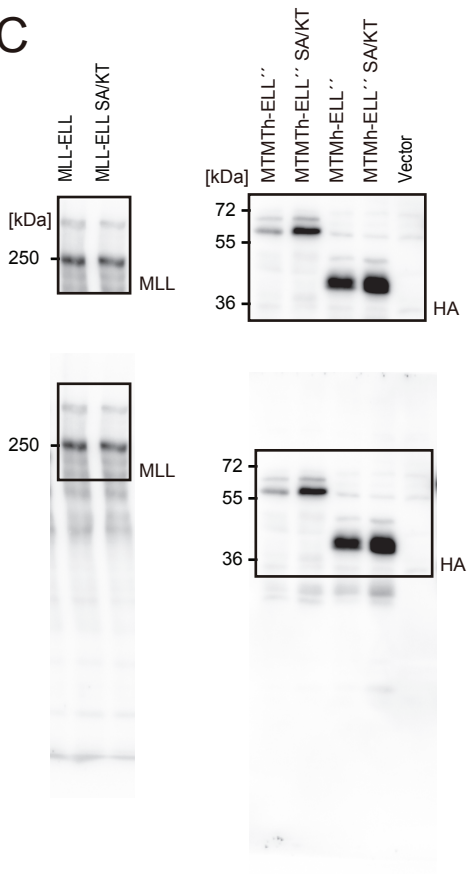

Supplement: elife-65872-data1.pdf [file elife-65872-data1.pdf]
